# Supplementary material for: Genetic Determinants for Prediction of Outcome of Patients with Papillary Thyroid Carcinoma
Source: MDPI journal article supplement (doi:10.3390/cancers13092048), 2021-04-23
Supplement: s1 [file s1]

**Supplementary Table S2** – BRAF, TERTp and RAS molecular status in lymph node metastases at diagnosis, locoregional recurrences and distant metastases and distribution in the different PTC variants.

| Gene(s)           | Status                                    | Lymph node metastases | Locoregional recurrences | Distant metastases |
|-------------------|-------------------------------------------|-----------------------|--------------------------|--------------------|
|                   |                                           | N=31                  | N=16                     | N=2 <sup>‡</sup>   |
| <b>BRAF</b>       | wt                                        | 14                    | 4                        | 0                  |
|                   | p.Val600Glu                               | 17 (54.8%)            | 12 (75.0%)               | 1 (n.a.)           |
| <b>TERTp</b>      | wt                                        | 27                    | 10                       | 0                  |
|                   | -124 G>A                                  | 2 (6.7%)              | 3 (20.0%)                | 1 (n.a.)           |
|                   | -146 G>A                                  | 1 (3.3%)              | 2 (13.3%)                | -                  |
|                   | -124/-125 G>A                             | 0 (0.0%)              | 0 (0.0%)                 | -                  |
| <b>BRAF/TERTp</b> | BRAF <sup>wt</sup> /TERTp <sup>wt</sup>   | 13                    | 2                        | 0                  |
|                   | BRAF <sup>mut</sup> /TERTp <sup>wt</sup>  | 14 (46.7%)            | 8 (53.3%)                | -                  |
|                   | BRAF <sup>wt</sup> /TERTp <sup>mut</sup>  | 1 (3.3%)              | 2 (13.3%)                | -                  |
|                   | BRAF <sup>mut</sup> /TERTp <sup>mut</sup> | 2 (6.7%)              | 3 (20.0%)                | 1 (n.a.)           |
| <b>RAS</b>        | wt                                        | 31                    | 15                       | 2 <sup>‡</sup>     |
|                   | RAS <sup>mut</sup>                        | 0 (0.0%)              | 0 (0.0%)                 | (n.a.)             |

<sup>‡</sup>one distant metastasis only amplified for NRAS; wt: wild-type; mut: mutated; n.a.: Not applicable.
