# Supplementary material for: Genetic Determinants for Prediction of Outcome of Patients with Papillary Thyroid Carcinoma
Source: MDPI journal article supplement (doi:10.3390/cancers13092048), 2021-04-23
Supplement: s1 [file s1]

Supplementary Table S1: Univariate analysis of clinicopathological features and combined gene mutations

| Clinicopathological features                          |                | A                                 | B                                   | C                                | D                                  | p-values              |                       |                    |                    |
|-------------------------------------------------------|----------------|-----------------------------------|-------------------------------------|----------------------------------|------------------------------------|-----------------------|-----------------------|--------------------|--------------------|
|                                                       |                | BRAFwt/TERTpwt<br>n = 79<br>n (%) | BRAFmut/TERTpwt<br>n = 120<br>n (%) | BRAFwt/TERTpmt<br>n = 4<br>n (%) | BRAFmut/TERTpmt<br>n = 11<br>n (%) | A...<br>vs<br>...B... | A...<br>vs<br>...C... | A...<br>vs<br>...D | .B..<br>vs<br>...D |
| Patient characteristics                               |                |                                   |                                     |                                  |                                    |                       |                       |                    |                    |
| Age                                                   | Mean ± Std     | 51.1 ± 14.3                       | 50.2 ± 15.2                         | 55.8 ± 16.3                      | 67.7 ± 14.6                        | 0.691                 | 0.610                 | 0.004              | 0.003              |
|                                                       | Female         | 68 (86.1%)                        | 102 (85%)                           | 3 (75%)                          | 7 (63.6%)                          | 0.833                 | 0.539                 | 0.082              | 0.089              |
| Gender                                                | Male           | 11 (13.9%)                        | 18 (15%)                            | 1 (25%)                          | 4 (36.4%)                          |                       |                       |                    |                    |
| Histological characteristics                          |                |                                   |                                     |                                  |                                    |                       |                       |                    |                    |
| Nodule size                                           | Median ± IR    | 12.0 ± 9.0                        | 11.0 ± 9.0                          | 26.5 ± 17.0                      | 20.0 ± 16.0                        | 0.158                 | 0.041                 | 0.267              | 0.057              |
| Solid component                                       | Absent         | 66 (83.5%)                        | 117 (97.5%)                         | 3 (75%)                          | 9 (81.8%)                          | <0.001                | 0.530                 | 1.000              | 0.056              |
|                                                       | Present        | 13 (16.5%)                        | 3 (2.5%)                            | 1 (25%)                          | 2 (18.2%)                          |                       |                       |                    |                    |
| Inflammatory infiltrate                               | Absent         | 18 (22.8%)                        | 6 (5%)                              | 1 (25%)                          | 0 (0%)                             | <0.001                | 1.000                 | 0.112              | 1.000              |
|                                                       | Present        | 61 (77.2%)                        | 114 (95%)                           | 3 (75%)                          | 11 (100%)                          |                       |                       |                    |                    |
| Fibrosis                                              | Absent         | 11 (13.9%)                        | 5 (4.2%)                            | 0 (0%)                           | 0 (0%)                             | 0.013                 | 1.000                 | 0.347              | 1.000              |
|                                                       | Present        | 68 (86.1%)                        | 115 (95.8%)                         | 4 (100%)                         | 11 (100%)                          |                       |                       |                    |                    |
| Venous invasion                                       | Absent         | 70 (88.6%)                        | 116 (96.7%)                         | 3 (75%)                          | 9 (81.8%)                          | 0.024                 | 0.408                 | 0.619              | 0.080              |
|                                                       | Present        | 9 (11.4%)                         | 4 (3.3%)                            | 1 (25%)                          | 2 (18.2%)                          |                       |                       |                    |                    |
| Lymph vessel invasion                                 | Absent         | 69 (87.3%)                        | 94 (78.3%)                          | 2 (50%)                          | 6 (54.5%)                          | 0.106                 | 0.098                 | 0.017              | 0.130              |
|                                                       | Present        | 10 (12.7%)                        | 26 (21.7%)                          | 2 (50%)                          | 5 (45.5%)                          |                       |                       |                    |                    |
| Nodule growth pattern                                 | Expansive      | 59 (74.7%)                        | 54 (45%)                            | 4 (100%)                         | 2 (18.2%)                          | <0.001                | 0.568                 | <0.001             | 0.115              |
|                                                       | Infiltrative   | 20 (25.3%)                        | 66 (55%)                            | 0 (0%)                           | 9 (81.8%)                          |                       |                       |                    |                    |
| Minimal extrathyroidal extension                      | Absent         | 61 (78.2%)                        | 52 (45.6%)                          | 2 (50%)                          | 3 (37.5%)                          | <0.001                | 0.228                 | 0.024              | 0.729              |
|                                                       | Minimal        | 17 (21.8%)                        | 62 (54.4%)                          | 2 (50%)                          | 5 (62.5%)                          |                       |                       |                    |                    |
| Gross extrathyroidal extension                        | Absent/minimal | 78 (98.7%)                        | 114 (95%)                           | 4 (100%)                         | 8 (72.7%)                          | 0.162                 | 1.000                 | 0.005              | 0.028              |
|                                                       | Gross          | 1 (1.3%)                          | 6 (5%)                              | 0 (0%)                           | 3 (27.3%)                          |                       |                       |                    |                    |
|                                                       | R0             | 72 (91.1%)                        | 104 (86.7%)                         | 3 (75%)                          | 8 (72.7%)                          |                       |                       |                    |                    |
| Resection margins                                     | R1/R2          | 7 (8.9%)                          | 16 (13.3%)                          | 1 (25%)                          | 3 (27.3%)                          | 0.334                 | 0.339                 | 0.102              | 0.200              |
|                                                       | Absent         | 78 (98.7%)                        | 101 (84.2%)                         | 4 (100%)                         | 8 (72.7%)                          |                       |                       |                    |                    |
| Central lymph node metastasis                         | Present        | 1 (1.3%)                          | 19 (15.8%)                          | 0 (0%)                           | 3 (27.3%)                          | 0.001                 | 1.000                 | 0.005              | 0.394              |
|                                                       | Absent         | 79 (100%)                         | 116 (96.7%)                         | 4 (100%)                         | 8 (72.7%)                          |                       |                       |                    |                    |
| Extranodal extension of central lymph node metastasis | Present        | 0 (0%)                            | 4 (3.3%)                            | 0 (0%)                           | 3 (27.3%)                          | 0.153                 | -                     | 0.001              | 0.013              |
|                                                       | Absent         | 74 (93.7%)                        | 112 (93.3%)                         | 4 (100%)                         | 8 (72.7%)                          |                       |                       |                    |                    |
| Lateral lymph node metastasis                         | Present        | 5 (6.3%)                          | 8 (6.7%)                            | 0 (0%)                           | 3 (27.3%)                          | 0.153                 | 1.000                 | 0.055              | 0.050              |
|                                                       | Absent         | 77 (97.5%)                        | 120 (100%)                          | 4 (100%)                         | 8 (72.7%)                          |                       |                       |                    |                    |
| Extranodal extension of lateral lymph node metastasis | Present        | 2 (2.5%)                          | 0 (0%)                              | 0 (0%)                           | 3 (27.3%)                          | 0.156                 | 1.000                 | 0.012              | <0.001             |
|                                                       | Absent         | 77 (97.5%)                        | 120 (100%)                          | 4 (100%)                         | 8 (72.7%)                          |                       |                       |                    |                    |
| Staging                                               |                |                                   |                                     |                                  |                                    |                       |                       |                    |                    |
| T stage                                               | T1-T2          | 73 (92.4%)                        | 112 (93.3%)                         | 4 (100%)                         | 8 (72.7%)                          | 0.802                 | 1.000                 | 0.077              | 0.050              |
|                                                       | T3-T4          | 6 (7.6%)                          | 8 (6.7%)                            | 0 (0%)                           | 3 (27.3%)                          |                       |                       |                    |                    |
| N stage                                               | N0             | 73 (92.4%)                        | 100 (83.3%)                         | 4 (100%)                         | 8 (72.7%)                          | 0.063                 | 1.000                 | 0.077              | 0.407              |
|                                                       | N1             | 6 (7.6%)                          | 20 (16.7%)                          | 0 (0%)                           | 3 (27.3%)                          |                       |                       |                    |                    |
| M stage                                               | M0             | 78 (98.7%)                        | 120 (100%)                          | 3 (75%)                          | 9 (81.8%)                          | 0.397                 | 0.095                 | 0.038              | 0.006              |
|                                                       | M1             | 1 (1.3%)                          | 0 (0%)                              | 1 (25%)                          | 2 (18.2%)                          |                       |                       |                    |                    |
| Stage                                                 | SI             | 76 (96.2%)                        | 114 (95%)                           | 3 (75%)                          | 6 (54.5%)                          | 0.355                 | 0.182                 | <0.001             | <0.001             |
|                                                       | SII            | 2 (2.5%)                          | 6 (5%)                              | 0 (0%)                           | 3 (27.3%)                          |                       |                       |                    |                    |
|                                                       | SIVB           | 1 (1.3%)                          | 0 (0%)                              | 1 (25%)                          | 2 (18.2%)                          |                       |                       |                    |                    |
| RAI treatment                                         |                |                                   |                                     |                                  |                                    |                       |                       |                    |                    |
| RAI number of treatments                              | 1              | 53 (93%)                          | 79 (85.9%)                          | 2 (50%)                          | 6 (66.7%)                          | 0.184                 | 0.045                 | 0.048              | 0.151              |
|                                                       | >1             | 4 (7%)                            | 13 (14.1%)                          | 2 (50%)                          | 3 (33.3%)                          |                       |                       |                    |                    |
| Risk stratification                                   |                |                                   |                                     |                                  |                                    |                       |                       |                    |                    |
| Risk stratification (RAI treated)                     | Low            | 32 (56.1%)                        | 31 (33.7%)                          | 0 (0%)                           | 1 (11.1%)                          | 0.024                 | 0.036                 | 0.002              | 0.007              |
|                                                       | Intermediate   | 22 (38.6%)                        | 55 (59.8%)                          | 3 (75%)                          | 4 (44.4%)                          |                       |                       |                    |                    |
|                                                       | High           | 3 (5.3%)                          | 6 (6.5%)                            | 1 (25%)                          | 4 (44.4%)                          |                       |                       |                    |                    |
| Risk stratification (non-RAI treated)                 | Low            | 19 (86.4%)                        | 18 (64.3%)                          | 0 (0%)                           | 1 (50%)                            | 0.108                 | -                     | 0.094              | 0.067              |
|                                                       | Intermediate   | 3 (13.6%)                         | 10 (35.7%)                          | 0 (0%)                           | 0 (0%)                             |                       |                       |                    |                    |
|                                                       | High           | 0 (0%)                            | 0 (0%)                              | 0 (0%)                           | 1 (50%)                            |                       |                       |                    |                    |
| Global dynamic risk stratification (RAI treated)      | Excelent       | 52 (91.2%)                        | 90 (97.8%)                          | 2 (50%)                          | 5 (55.6%)                          | 0.107                 | 0.061                 | 0.016              | <0.001             |
|                                                       | Incomplete     | 5 (8.8%)                          | 2 (2.2%)                            | 2 (50%)                          | 4 (44.4%)                          |                       |                       |                    |                    |
| Global dynamic risk stratification (non-RAI treated)  | Excelent       | 21 (95.5%)                        | 27 (96.4%)                          | 0 (0%)                           | 2 (100%)                           | 1.000                 | -                     | 1.000              | 1.000              |
|                                                       | Incomplete     | 1 (4.5%)                          | 1 (3.6%)                            | 0 (0%)                           | 0 (0%)                             |                       |                       |                    |                    |
