# Supplementary material for: Genetic Determinants for Prediction of Outcome of Patients with Papillary Thyroid Carcinoma
Source: MDPI journal article supplement (doi:10.3390/cancers13092048), 2021-04-23
Supplement: s1 [file s1]

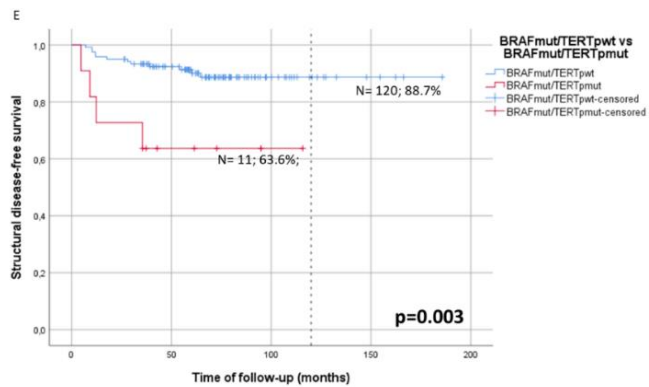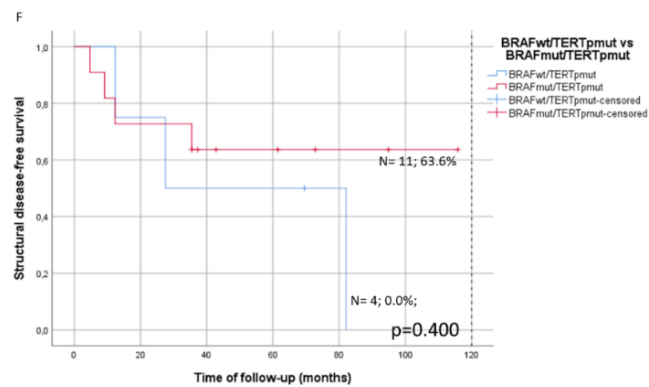

**Supplementary Figure S2** – Kaplan-Meier curves of structural disease-free survival by concomitant BRAF and TERT promoter mutations in comparison to tumors mutated only for BRAF (E) and only for TERTp (F).wt: wild-type; mut: mutated.
