# Supplementary material for: Genetic Determinants for Prediction of Outcome of Patients with Papillary Thyroid Carcinoma
Source: Cancers (Basel). 2021 Apr 23;13(9):2048. doi: 10.3390/cancers13092048 (PMC8122921; doi:10.3390/cancers13092048)
Supplement: Supplementary file 1 [file cancers-13-02048-s001.zip]

Archive with 5 entries (5 files):
- cancers-1161982-Supplementary Table S1.pdf
- Povoa AA - Supplementary Figure S1.pdf
- Povoa AA - Supplementary Figure S2.pdf
- Povoa AA -Supplementary Figure S3.pdf
- Povoa AA -Supplementary Table S2.pdf
